# Supplementary material
Source: Springer Nature journal article supplement (https://www.springermedizin.de/resource/supplementary/12882_2012_346_MOESM3_ESM.pdf/9453438)

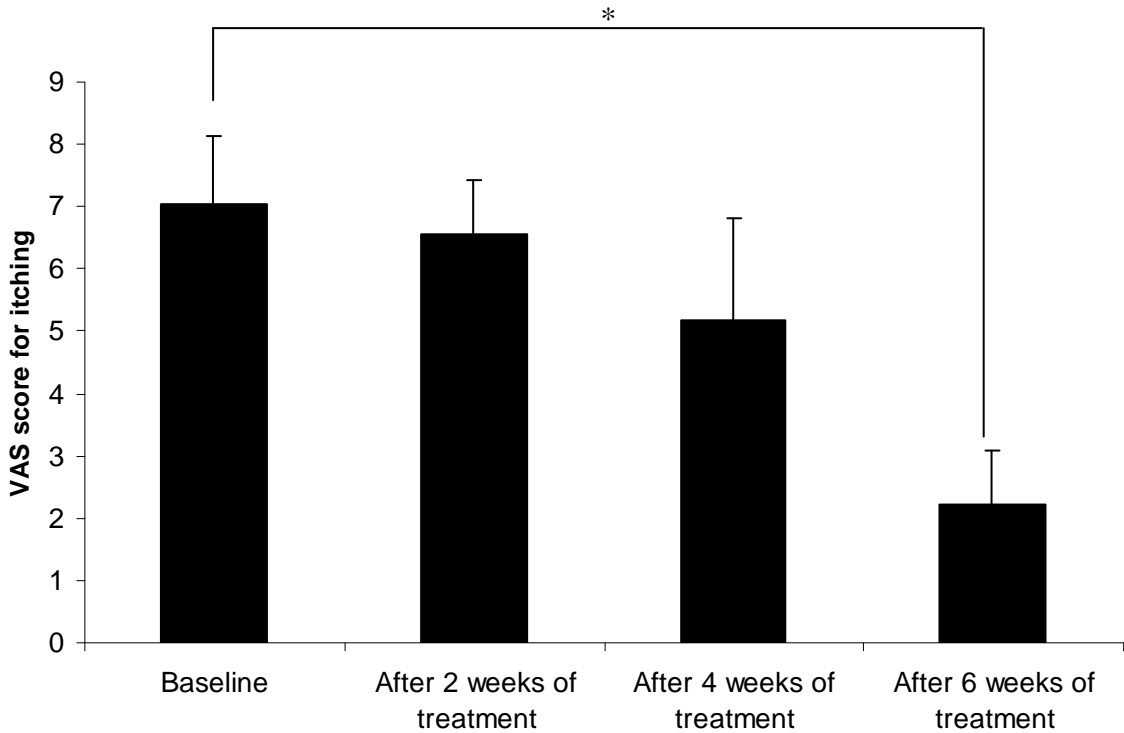

Supplement: MOESM3 [file 9453438]
